# Supplementary material for: Optimization of Fermentation Conditions and Metabolite Profiling of Grape Juice Fermented with Lactic Acid Bacteria for Improved Flavor and Bioactivity
Source: MDPI journal article supplement (doi:10.3390/foods12122407), 2023-06-18
Supplement: s1 [file s1]

**Supplementary Information to**

**Optimization of Fermentation Conditions and Metabolite**

**Profiling of Grape Juice Fermented with Lactic Acid Bacteria for**

**Improved Flavor and Bioactivity**

*Part 1: Determination of the strains function and optimizing the fermentation conditions (Figure S1-S4; Table S1-S5)*

*Part 2: Analyses of metabolites profiles during the multi-strain fermentation stages (Figure S5-S7; Table S6-S8)*

*Part 3: Analyses of VOCs profiles (Figure S8; Table S8-S10)*

Part 1:Determination of the strains function and optimizing the fermentation conditions (Figure S1-S4; Table S1-table S5)

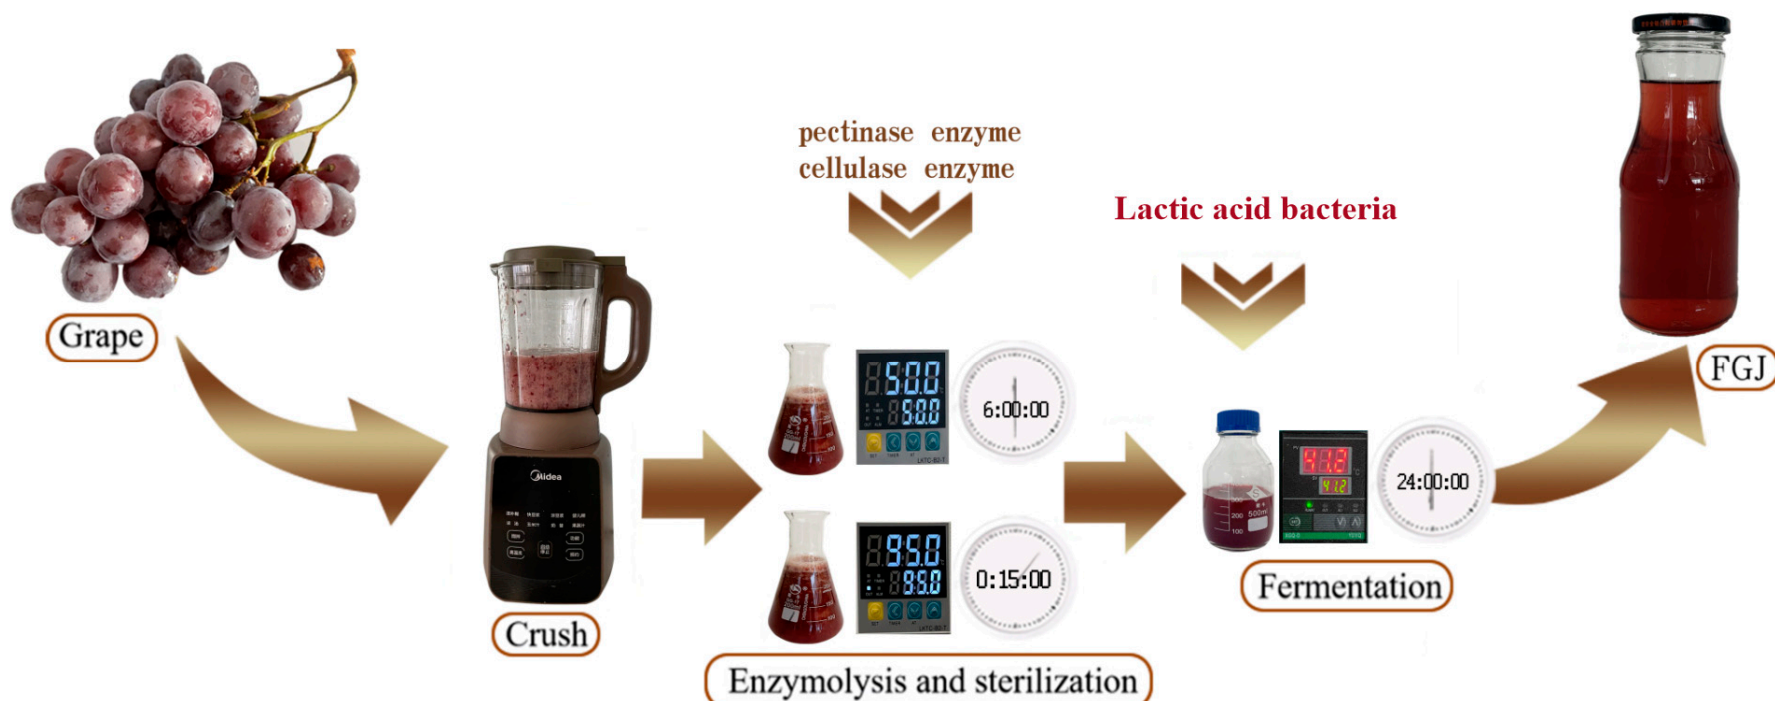

Figure S1 The diagram of process flow of product FGJ

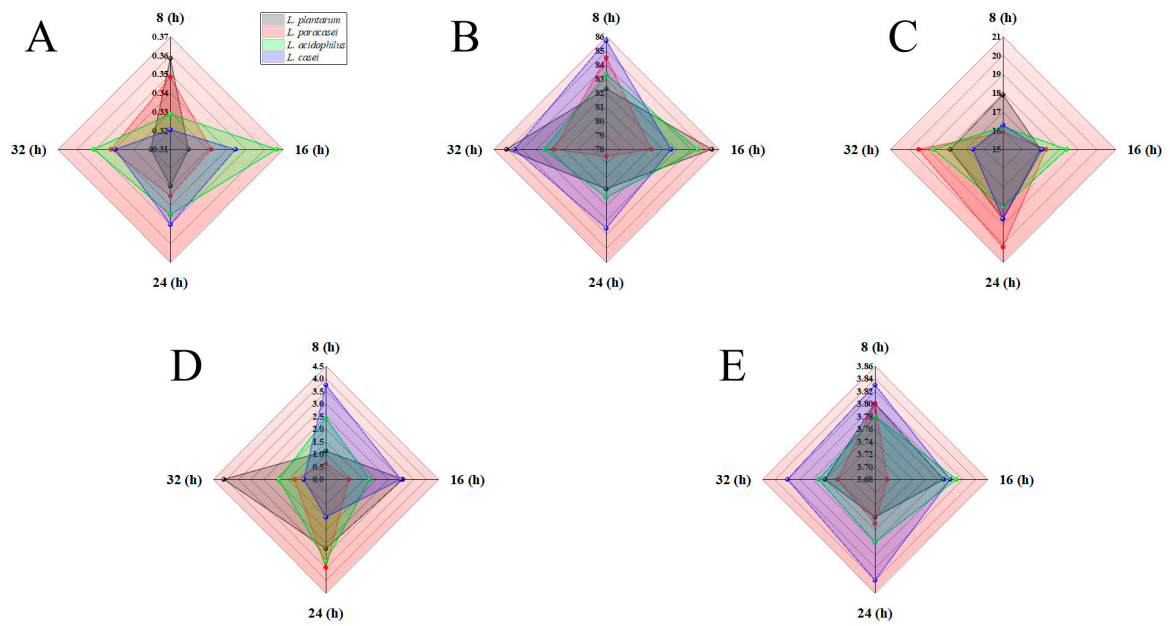

**Figure S2** Radar map analysis in TPC (A), clarification (B), TSS (C), LAB density (D), and pH (E) of FGJ during different single-strain (*L. plantarum*, *L. acidophilus*, *L. casei*, *L. paracasei*) fermentation stages

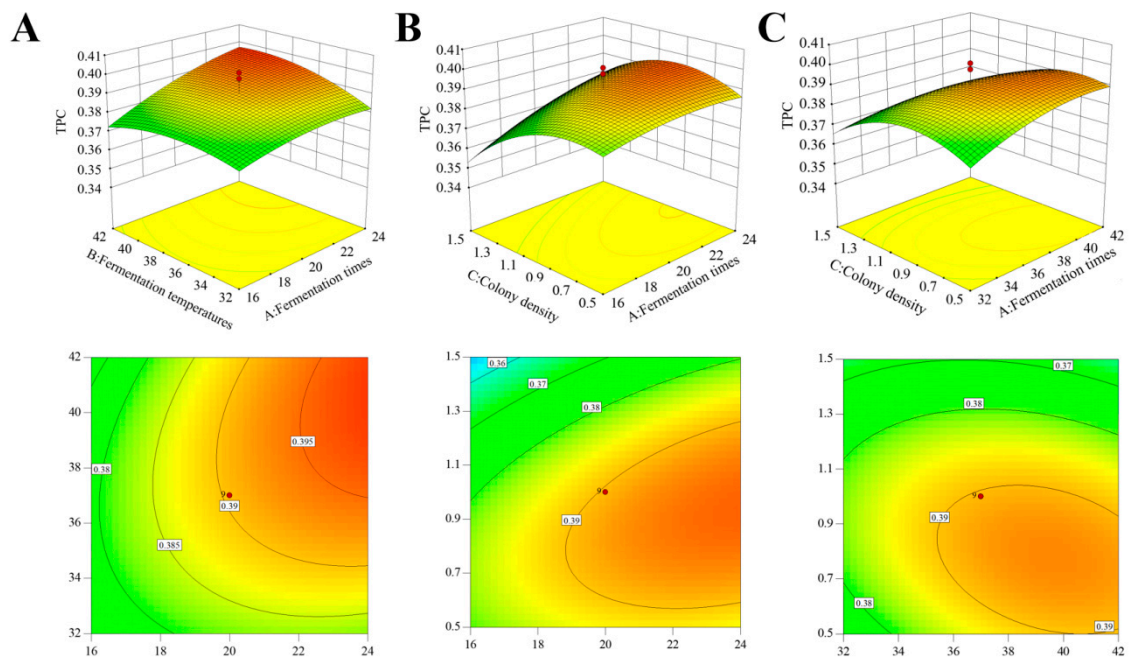

**Figure S3** Three-dimensional (3D) response surfaces of different factors (A:fermentation time; B:fermentation temperature; C:Colony density) on the TPC of FGJ

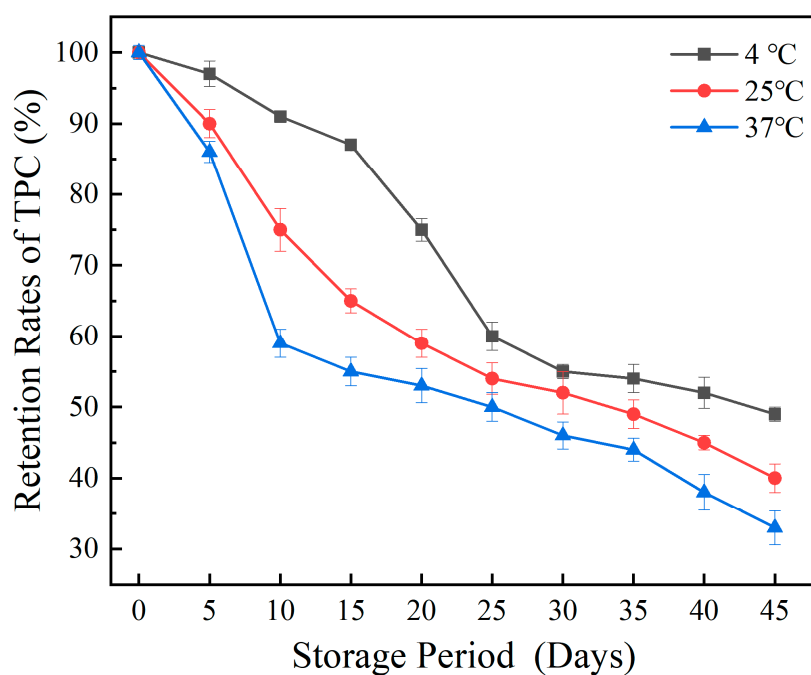

**Figure S4** Changes in retention rate of TPC during accelerated storage period

**Table S1** Uniform design factor level table

| Factor | <i>L. plantarum</i> | <i>L.acidophilus</i> | <i>L. casei</i> | <i>L. paracasei</i> |
|--------|---------------------|----------------------|-----------------|---------------------|
|        | X1/%                | X2/%                 | X3/%            | X4/%                |
| 1      | 0.64                | 0.61                 | 0.55            | 0.43                |
| 2      | 0.65                | 0.65                 | 0.58            | 0.46                |
| 3      | 0.67                | 0.62                 | 0.56            | 0.47                |
| 4      | 0.63                | 0.66                 | 0.52            | 0.48                |
| 5      | 0.66                | 0.64                 | 0.51            | 0.41                |
| 6      | 0.62                | 0.67                 | 0.57            | 0.42                |
| 7      | 0.68                | 0.68                 | 0.54            | 0.44                |
| 8      | 0.61                | 0.63                 | 0.53            | 0.45                |

**Table S2** Results of the uniform design experiment

| Factor | <i>L. plantarum</i><br>X1/% | <i>L.acidophilus</i><br>X2/% | <i>L. casei</i><br>X3/% | <i>L. paracasei</i><br>X4/% | TPC (mg<br>GAE/mL) |
|--------|-----------------------------|------------------------------|-------------------------|-----------------------------|--------------------|
| 1      | 0.64                        | 0.61                         | 0.55                    | 0.43                        | 0.341              |
| 2      | 0.65                        | 0.65                         | 0.58                    | 0.46                        | 0.364              |
| 3      | 0.67                        | 0.62                         | 0.56                    | 0.47                        | 0.355              |
| 4      | 0.63                        | 0.66                         | 0.52                    | 0.48                        | 0.365              |
| 5      | 0.66                        | 0.64                         | 0.51                    | 0.41                        | 0.351              |
| 6      | 0.62                        | 0.67                         | 0.57                    | 0.42                        | 0.362              |
| 7      | 0.68                        | 0.68                         | 0.54                    | 0.44                        | 0.379              |
| 8      | 0.61                        | 0.63                         | 0.53                    | 0.45                        | 0.344              |

**Table S3** The level table of response surface factors

| Level | Factors                    |                                    |                                           |
|-------|----------------------------|------------------------------------|-------------------------------------------|
|       | A fermentation time<br>(h) | B fermentation<br>temperature (°C) | C LAB density<br>(10 <sup>7</sup> CFU/mL) |
| -1.68 | 13.28                      | 28.6                               | 0.16                                      |
| -1    | 16                         | 32                                 | 0.5                                       |
| 0     | 20                         | 37                                 | 1                                         |
| 1     | 24                         | 42                                 | 1.5                                       |
| 1.68  | 26.72                      | 45.4                               | 1.84                                      |

**Table S4** Experimental results of multi-strain fermentation by response surface design

| Number | A<br>fermentation<br>time (h) | B<br>fermentation<br>temperature (°C) | C<br>LAB density (10 <sup>7</sup><br>CFU/mL) | TPC<br>(mg GAE/mL) |
|--------|-------------------------------|---------------------------------------|----------------------------------------------|--------------------|
| 1      | 16                            | 32                                    | 1.5                                          | 0.348              |
| 2      | 26.73                         | 37                                    | 1                                            | 0.392              |
| 3      | 24                            | 32                                    | 0.5                                          | 0.367              |
| 4      | 16                            | 32                                    | 0.5                                          | 0.373              |
| 5      | 20                            | 37                                    | 1                                            | 0.386              |
| 6      | 20                            | 37                                    | 1                                            | 0.385              |
| 7      | 16                            | 42                                    | 1.5                                          | 0.345              |
| 8      | 20                            | 37                                    | 1                                            | 0.389              |
| 9      | 20                            | 45.41                                 | 1                                            | 0.377              |
| 10     | 24                            | 32                                    | 1.5                                          | 0.373              |
| 11     | 20                            | 37                                    | 1.84                                         | 0.343              |
| 12     | 24                            | 42                                    | 0.5                                          | 0.399              |
| 13     | 16                            | 42                                    | 0.5                                          | 0.378              |
| 14     | 20                            | 37                                    | 1                                            | 0.387              |
| 15     | 20                            | 37                                    | 1                                            | 0.388              |
| 16     | 13.27                         | 37                                    | 1                                            | 0.370              |
| 17     | 20                            | 28.59                                 | 1                                            | 0.374              |
| 18     | 20                            | 37                                    | 0.16                                         | 0.370              |
| 19     | 24                            | 42                                    | 1.5                                          | 0.377              |
| 20     | 20                            | 37                                    | 1                                            | 0.401              |
| 21     | 20                            | 37                                    | 1                                            | 0.398              |
| 22     | 20                            | 37                                    | 1                                            | 0.390              |
| 23     | 20                            | 37                                    | 1                                            | 0.390              |

**Table S5** Analysis of variance and significance test for the response values regression model

| Source of variance     | Quadratic sum             | Variance | Mean square | F Number | <i>p</i> Number | significance    |
|------------------------|---------------------------|----------|-------------|----------|-----------------|-----------------|
| Model                  | 0.00544                   | 9        | 0.00060     | 21.65    | < 0.0001        | **              |
| A-Fermentation time    | 0.00087                   | 1        | 0.00087     | 31.19    | < 0.0001        | **              |
| B-Fermentation         | 0.00014                   | 1        | 0.00014     | 4.86     | 0.0460          | *               |
| C-temperature          | 0.00104                   | 1        | 0.00104     | 37.43    | < 0.0001        | **              |
| AB                     | 0.00014                   | 1        | 0.00014     | 5.18     | 0.0404          | *               |
| AC                     | 0.00022                   | 1        | 0.00022     | 7.90     | 0.0147          | *               |
| BC                     | 0.00016                   | 1        | 0.00016     | 5.81     | 0.0315          | *               |
| A2                     | 0.00017                   | 1        | 0.00017     | 6.21     | 0.0270          | *               |
| B2                     | 0.00044                   | 1        | 0.00044     | 15.68    | 0.0016          | **              |
| C2                     | 0.00227                   | 1        | 0.00227     | 81.53    | < 0.0001        | **              |
| Residual               | 0.00036                   | 13       | 0.00003     |          |                 |                 |
| Unplanned item         | 0.00012                   | 5        | 0.00002     | 0.84     | 0.5594          | Not significant |
| Error term             | 0.00024                   | 8        | 0.00003     |          |                 |                 |
| Total                  | 0.00580                   | 22       |             |          |                 |                 |
| R <sup>2</sup> =0.9386 | R <sup>2</sup> Adj=0.8960 |          |             |          |                 |                 |

Part 2: Analyses of metabolites profiles during the multi-strain fermentation stages  
(Figure S5-S7; Table S6-S8)

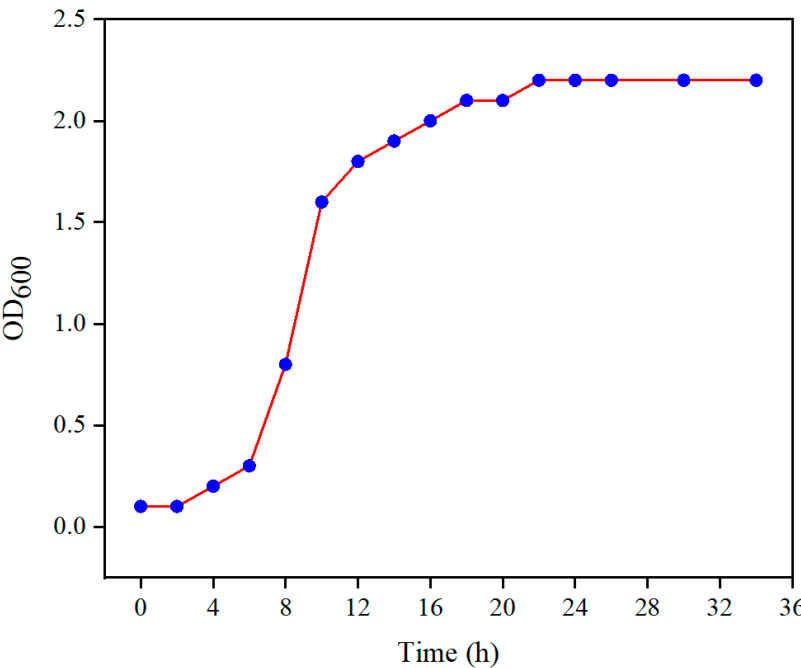

**Figure S5** Growth curve analysis of multi-strain during different incubate stages

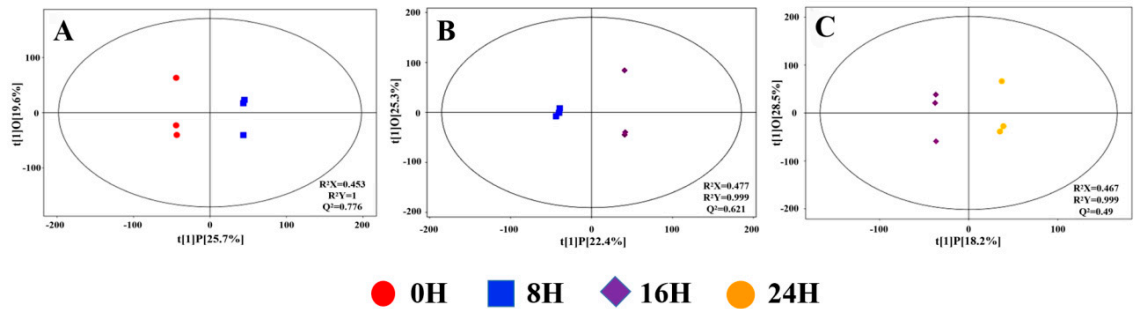

**Figure S6** OPLS-DA score plots analysis of FGJ during different multi-strain fermentation stages (A: 0-8h; B: 8-16h; C:16-24h)



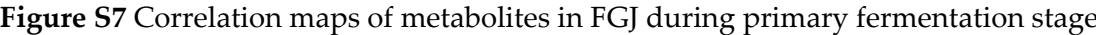

**Table S6** Differential metabolites in FGJ during the three different multi-strain fermentation stages

| NO | Primary fermentation stage<br>(0-8h)                                | Post fermentation stage<br>(8-16h)                             | Final fermentation stage<br>(16-24h)     |
|----|---------------------------------------------------------------------|----------------------------------------------------------------|------------------------------------------|
| 1  | Dexamethasone                                                       | H-LEU-VAL-OH                                                   | Phytosphingosine                         |
| 2  | 2,3-Dihydro-2,3-dihydroxy-4-(4-methoxyphenyl)-<br>1H-phenalen-1-one | Cortisone                                                      | Protoanemonin                            |
| 3  | D-Proline                                                           | xi-3-(4-Isopropylphenyl)-2-m<br>ethylpropanal                  | 1-Kestose                                |
| 4  | Beta-Aminopropionitrile                                             | Isoleucyl-Leucine                                              | Tridemorph                               |
| 5  | Yuccaol C                                                           | Dictyoquinazol C                                               | Theaflagallin                            |
| 6  | 1-Kestose                                                           | LysoPE(0:0/14:0)                                               | Rubraflavone C                           |
| 7  | Theaflagallin                                                       | 5,7-Dihydroxy-8,4'-dimethoxy<br>isoflavone                     | Palmitoylethanolamide                    |
| 8  | Adenosine                                                           | Diospyrin                                                      | 5-Decanoyl-2-nonylpyridi<br>ne<br>Methyl |
| 9  | Occidentoside                                                       | Palmitoylethanolamide                                          | 6-O-galloyl-beta-D-glucop<br>yranoside   |
| 10 | Petunidin 3-glucoside                                               | Phenylalanyl-Arginine                                          | Pyrophaeophorbide a                      |
| 11 | Isoleucyl-Leucine                                                   | 1-(5Z,8Z,11Z,14Z-eicosatetrae<br>nonyl)-sn-glycero-3-phosphate | Tetraacetythylenediami<br>ne             |
| 12 | 15-oxo-5S,6R-dihydroxy-7E,9E,11Z-eicosatrienoic<br>acid             | Artemoin A                                                     | 4,4-Dimethoxy-2-butanon<br>e             |
| 13 | 1-deoxy-1-(N6-lysino)-D-fructose                                    | PE(20:0/18:1(9Z))                                              | Bismahanine                              |
| 14 | 5,7-Dihydroxy-8,4'-dimethoxyisoflavone                              | Romucosine A                                                   | Polyoxyethylene (600)<br>monoricinoleate |
| 15 | Suillusin                                                           | Bismahanine                                                    | Palmitoleoyl<br>Ethanolamide             |
| 16 | Mammea B/BA                                                         | PE(P-18:1(11Z)/22:5(4Z,7Z,10<br>Z,13Z,16Z))                    | Isoleucyl-Phenylalanine                  |
| 17 | Phenylalanyl-Alanine                                                | 3,4-Dihydroxyphenyllactic<br>acid methyl ester                 | Bisphenol A                              |
| 18 | Kojibiose                                                           | Ursolic acid                                                   | 8-Butanoylneosalaniol                    |

|    |               |                   |           |
|----|---------------|-------------------|-----------|
| 19 | Heterophyllol | Dihydrofukinolide | Linamarin |
|----|---------------|-------------------|-----------|

**Table S6** Differential metabolites in FGJ during the three different multi-strain fermentation stages

| NO | Primary fermentation stage<br>(0-8h)         | Post fermentation stage<br>(8-16h)                                      | Final fermentation stage<br>(16-24h)                            |
|----|----------------------------------------------|-------------------------------------------------------------------------|-----------------------------------------------------------------|
| 20 | Imidazole-4-acetaldehyde                     | Prenyl caproate                                                         | Annocherin A                                                    |
| 21 | Aspergillomarasmine A                        | Aldosterone 18-glucuronide                                              | Methyl<br>3-(2,3-dihydroxy-3-methylbutyl)-4-hydroxybenzoate     |
| 22 | Caryophyllene alpha-oxide                    | (-)-Epigallocatechin 3-(4-methyl-gallate)                               | Serylisoleucine                                                 |
| 23 | 2'',6''-Di-O-acetylononin                    | Glycyl-L-Leucine                                                        | LysoPC(20:4(5Z,8Z,11Z,14Z))                                     |
| 24 | Methyl<br>6-O-galloyl-beta-D-glucopyranoside | Leucyl-Lysine                                                           | 6-Methyladenine                                                 |
| 25 | Methionyl-Cysteine                           | Leucyl-Gamma-glutamate                                                  | 4-p-Coumaroyl-1,5-quinolactone                                  |
| 26 | Glycerophosphocholine                        | Dimethyl<br>3-methoxy-4-oxo-5-(8,11,14-pentadecatrienyl)-2-hexenedioate | D-Galactopyranosyl-(1->3)-D-galactopyranosyl-(1->3)-L-arabinose |
| 27 | N1,N10-Dicoumaroylspermidine                 | Trifluoromethanesulfonic acid                                           | Lycoperoside D                                                  |
| 28 | Artemoin A                                   | Solanocardinol                                                          | Macrocarpal I                                                   |
| 29 | Kanzonol G                                   | PE(22:4(7Z,10Z,13Z,16Z)/18:1(11Z))                                      | Pipericine                                                      |
| 30 | Grevilline C                                 | Leucyl-Methionine                                                       | Malvidin 3-sophoroside 5-glucoside                              |
| 31 | PI(18:1(11Z)/16:1(9Z))                       | Linamarin                                                               | Aspartyl-Leucine                                                |
| 32 | cis-3-Hexenyl<br>b-primeveroside             | Anhydrocinnzeylanine                                                    | (2R*,3R*)-1,2,3-Butanetriol                                     |
| 33 | Myricetin 3-robinobioside                    | Thiomorpholine 3-carboxylate                                            | 3'-Glucosyl-2',4',6'-trihydroxyacetophenone                     |
| 34 | Isopropyl beta-D-glucoside                   | (R) 2,3-Dihydroxy-3-methylvalerate                                      | Edulinine                                                       |
| 35 | PC(16:1(9Z)/P-18:0)                          | Ethoxyquin                                                              | PA(18:0/20:4(5Z,8Z,11Z,14Z))                                    |
| 36 | Galactosylhydroxylysine                      | 28-Norcyclomusalenone                                                   |                                                                 |
| 37 | Isopimpinellin                               | Tyrosyl-Serine                                                          |                                                                 |
| 38 | 3,4-Dihydroxyphenyllactic                    | Lycoperoside D                                                          |                                                                 |

|                                                                                                             | acid methyl ester                                                           |                                                                                                             |                                      |
|-------------------------------------------------------------------------------------------------------------|-----------------------------------------------------------------------------|-------------------------------------------------------------------------------------------------------------|--------------------------------------|
| 39                                                                                                          | Ursolic acid                                                                | Margrapine A                                                                                                |                                      |
| <b>Table S6</b> Differential metabolites in FGJ during the three different multi-strain fermentation stages |                                                                             |                                                                                                             |                                      |
| NO                                                                                                          | Primary fermentation stage<br>(0-8h)                                        | Post fermentation stage<br>(8-16h)                                                                          | Final fermentation stage<br>(16-24h) |
| 39                                                                                                          | Ursolic acid                                                                | Margrapine A                                                                                                |                                      |
| 40                                                                                                          | Dihydrofukinolide                                                           | Ephedrannin A                                                                                               |                                      |
| 41                                                                                                          | Glyceraldehyde                                                              | 1,3-Diphenyl-1-propanone                                                                                    |                                      |
| 42                                                                                                          | 4-Hydroxyphenylacetone nitrile<br>triacylglycerol                           | 3-Methylthiohexyl hexanoate                                                                                 |                                      |
| 43                                                                                                          | Glycyl-L-Leucine                                                            | Patuletin 3-(2''-apiosylgentiobioside)                                                                      |                                      |
| 44                                                                                                          | Alpha-dimorphelic acid                                                      | (3a,5b,7a,12a)-24-[(carboxymethyl)amino]-1,12-dihydroxy-2<br>4-oxocholan-3-yl-b-D-Glucopyranosiduronic acid |                                      |
| 45                                                                                                          | Valyl-Hydroxyproline                                                        | Piperidine                                                                                                  |                                      |
| 46                                                                                                          | Methoxypyrazine                                                             | N-[2-(4-Prenyloxyphenyl)ethyl]tiglamide                                                                     |                                      |
| 47                                                                                                          | Malvidin 3-(6-acetylglucoside)                                              | Safflorin C                                                                                                 |                                      |
| 48                                                                                                          | Isoleucyl-Tryptophan                                                        | L-N-(3-Carboxypropyl)glutamine<br>(3R,                                                                      |                                      |
| 49                                                                                                          | Mollicellin A                                                               | 6'Z)-3,4-Dihydro-8-hydroxy-3-(6-pentadecenyl)-1H-2-benzo<br>pyran-1-one                                     |                                      |
| 50                                                                                                          | Dimethyl<br>3-methoxy-4-oxo-5-(8,11,14-pentadeca<br>trienyl)-2-hexenedioate | Inositol cyclic phosphate                                                                                   |                                      |
| 51                                                                                                          | Lycopersiconol                                                              | Sagequinone methide A                                                                                       |                                      |
| 52                                                                                                          | LysoPC(16:0)                                                                |                                                                                                             |                                      |
| 53                                                                                                          | Cholic acid glucuronide                                                     |                                                                                                             |                                      |
| 56                                                                                                          | Eremopetasitenin C3                                                         |                                                                                                             |                                      |
| 57                                                                                                          | Austalide F                                                                 |                                                                                                             |                                      |
| 58                                                                                                          | N-2-[4-(3,3-Dimethylallyloxy)phenyl]<br>ethylcinnamide                      |                                                                                                             |                                      |
| 59                                                                                                          | ( $\hat{\alpha}$ )-alpha-Narcotine                                          |                                                                                                             |                                      |
| 60                                                                                                          | Dalbergioidin                                                               |                                                                                                             |                                      |

|    |                      |
|----|----------------------|
| 61 | Anhydrocinnzeylanine |
|----|----------------------|

**Table S6** Differential metabolites in FGJ during the three different multi-strain fermentation stages

| N  | Primary fermentation stage                                                                                            | Post fermentation stage | Final fermentation stage |
|----|-----------------------------------------------------------------------------------------------------------------------|-------------------------|--------------------------|
| O  | (0-8h)                                                                                                                | (8-16h)                 | (16-24h)                 |
| 62 | Thiomorpholine 3-carboxylate                                                                                          |                         |                          |
| 63 | Cervonyl carnitine                                                                                                    |                         |                          |
| 64 | (+)-Lyoniresinol 9-glucoside                                                                                          |                         |                          |
| 65 | PE(18:3(6Z,9Z,12Z)/14:0)                                                                                              |                         |                          |
| 66 | Methyl<br>4,6-di-O-galloyl-beta-D-glucopyranoside                                                                     |                         |                          |
| 67 | 2,3-Dihydroxy-1-(4-hydroxy-3-methoxyphenyl)-1-propanone                                                               |                         |                          |
| 68 | PE(14:1(9Z)/14:1(9Z))                                                                                                 |                         |                          |
| 69 | 5,7-dihydroxy-2-phenyl-6-[3,4,5-trihydroxy-6-(hydroxymethyl)oxan-2-yl]-8-(3,4,5-trihydroxyoxan-2-yl)-4H-chromen-4-one |                         |                          |
| 70 | D-Tagatose 6-phosphate                                                                                                |                         |                          |
| 71 | Sorbitan stearate                                                                                                     |                         |                          |
| 72 | Aminofructose 6-phosphate                                                                                             |                         |                          |
| 73 | 3-beta-Cellobiosylcellobiose                                                                                          |                         |                          |
| 74 | 28-Norcyclomusalenone                                                                                                 |                         |                          |
| 75 | 2,3-Pentanedione                                                                                                      |                         |                          |
| 76 | Ephedrannin A                                                                                                         |                         |                          |
| 77 | Sucrose                                                                                                               |                         |                          |
| 78 | Chrysoeriol 7-O-(6"-malonyl-glucoside)                                                                                |                         |                          |
| 79 | (3a,5b,7a,12a)-24-[(carboxymethyl)amino]-1,12-dihydroxy-24-oxocholan-3-yl-beta-D-Glucopyranosiduronic acid            |                         |                          |
| 93 | Desglucocheirotaxol                                                                                                   |                         |                          |
| 94 | D-1-Amino-2-pyrrolidinecarboxylic acid                                                                                |                         |                          |

|    |                                                        |
|----|--------------------------------------------------------|
| 95 | Epigallocatechin-(4beta->8)-epicatechin<br>3-O-gallate |
|----|--------------------------------------------------------|

**Table S6** Differential metabolites in FGJ during the three different multi-strain fermentation stages

| NO  | Primary fermentation stage<br>(0-8h)        | Post fermentation stage<br>(8-16h) | Final fermentation stage<br>(16-24h) |
|-----|---------------------------------------------|------------------------------------|--------------------------------------|
| 96  | Pandamarilactone 31                         |                                    |                                      |
| 97  | Sagequinone methide A                       |                                    |                                      |
| 98  | Methyl (9Z)-6'-oxo-6,5'-diapo-6-carotenoate |                                    |                                      |
| 99  | Diphenyl disulfide                          |                                    |                                      |
| 100 | 8,11,14-Eicosatrienoic acid                 |                                    |                                      |
| 101 | Epigallocatechin-(4beta->8)-catechin        |                                    |                                      |



**Table S7** Key differential metabolites in FGJ during the three different multi-strain fermentation stages

| Fermentation stages | N <sub>o</sub> | MS2-name                          | MS2-score | <sup>a</sup> Rt | <sup>b</sup> mz | Mean (0h) | Mean (8h) | Mean (16h) | Mean (24h) | VIP   | P-VALUE | Q-VALUE | FOLD-CHANGE |
|---------------------|----------------|-----------------------------------|-----------|-----------------|-----------------|-----------|-----------|------------|------------|-------|---------|---------|-------------|
| 0-8h                | 1              | 2',6'-Di-O-acetylononin           | 0.913     | 77.370          | 515.142         | 0.007     | 0.048     | 0.039      | 0.061      | 1.745 | 0.013   | 0.289   | 7.385       |
|                     | 2              | 5,7-dihydroxy-2-phenyl-6-         | 0.533     | 314.156         | 549.158         | 0.029     | 0.060     | 0.045      | 0.035      | 1.806 | 0.033   | 0.427   | 2.059       |
|                     | 3              | Ephedrannin A                     | 0.467     | 46.226          | 557.118         | 0.232     | 0.108     | 0.089      | 0.097      | 2.009 | 0.025   | 0.381   | 0.467       |
|                     | 4              | Proanthocyanidin A2               | 0.432     | 301.176         | 577.132         | 0.013     | 0.006     | 0.006      | 0.005      | 1.967 | 0.003   | 0.172   | 0.469       |
|                     | 5              | Epigallocatechin-(4β->8)-catechin | 0.307     | 260.755         | 595.142         | 0.047     | 0.010     | 0.010      | 0.009      | 2.057 | 0       | 0.021   | 0.213       |
|                     | 6              | 1-Kestose                         | 0.987     | 63.783          | 527.156         | 0.031     | 0.212     | 0.197      | 0.277      | 1.793 | 0.004   | 0.192   | 6.894       |
|                     | 7              | 3-β-Cellobiosylcellobiose         | 0.519     | 48.559          | 667.225         | 0.003     | 0.387     | 0.395      | 0.412      | 1.886 | 0.003   | 0.171   | 132.930     |
|                     | 8              | Galactotriose                     | 0.377     | 47.635          | 505.175         | 0.050     | 0.443     | 0.404      | 0.461      | 2.056 | 0.0001  | 0.054   | 8.732       |
|                     | 9              | Linamarin                         | 0.568     | 69.763          | 248.111         | 0.138     | 0.123     | 0.221      | 0.106      | 1.858 | 0.037   | 1.000   | 0.480       |
| 8-16h               | 10             | Dimethyl 3-methoxy-4              | 0.699     | 253.828         | 421.255         | 0.010     | 0.024     | 0.029      | 0.032      | 1.996 | 0.001   | 0.082   | 2.321       |
|                     | 11             | Palmitoylethanolamide             | 0.945     | 623.717         | 300.289         | 0.043     | 0.052     | 0.020      | 0.053      | 1.805 | 0.026   | 1.000   | 0.389       |
|                     | 12             | Trifluoromethanesulfonic acid     | 0.665     | 26.806          | 150.968         | 0.155     | 0.386     | 0.100      | 0.151      | 2.036 | 0.001   | 1.000   | 0.260       |
| 16-24h              | 13             | Tetraacetylenediamine             | 0.899     | 97.560          | 229.117         | 0.150     | 0.074     | 0.099      | 0.202      | 1.861 | 0.029   | 1.000   | 2.029       |

<sup>a</sup>RT, retention time; <sup>b</sup>m/z, mass to charge ratio.



Part 3: Analyses of VOCs profiles (Figure S8; Table S8-S10)

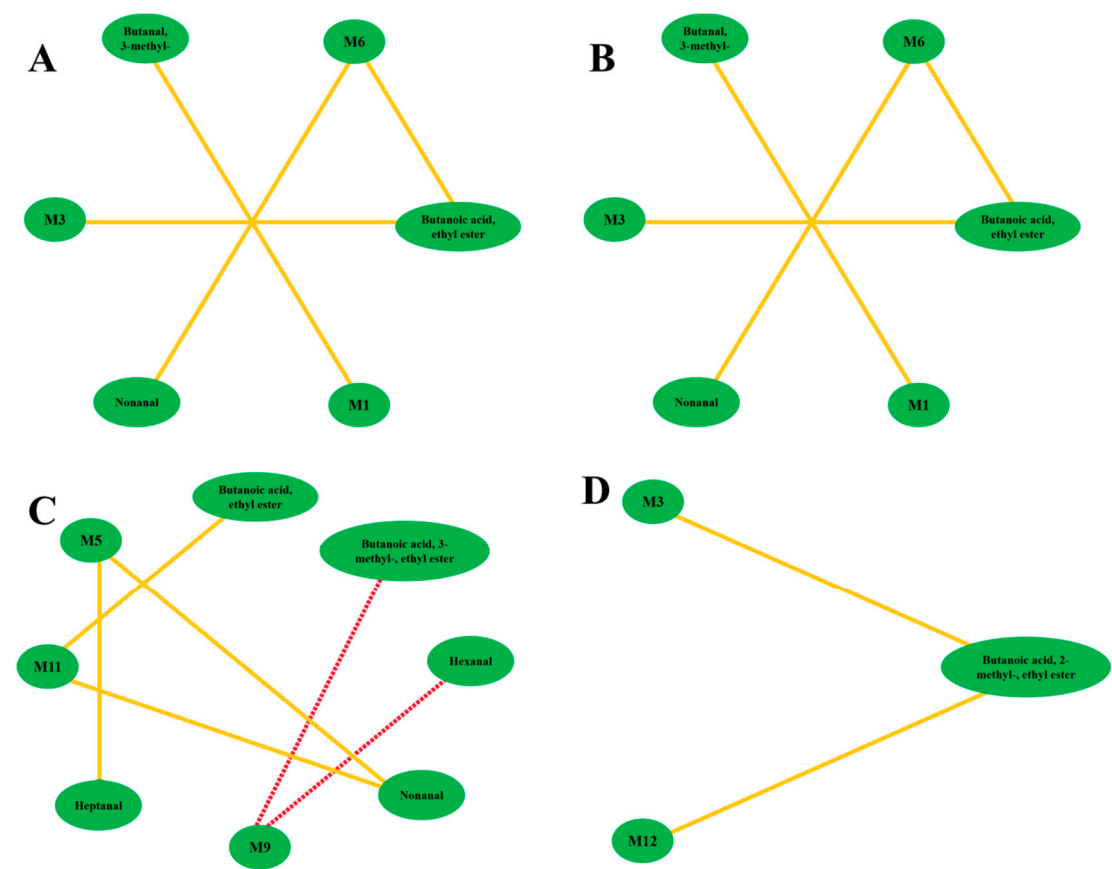

**Figure S8** Networks between the VOCs and saccharides in FGJ based on correlation analyses (A: 0h; B: 8h; C: 16h; D: 24h)

**Table S8** VOCs in FGJ after 24H of multi-strain fermentation

| count           | compound                                                            | CAS        | Formula                                        | mw  | Rt     |
|-----------------|---------------------------------------------------------------------|------------|------------------------------------------------|-----|--------|
| <b>Aldehyde</b> |                                                                     |            |                                                |     |        |
| 1               | 1-Cyclohexene-1-carboxaldehyde, 2,6,6-trimethyl-                    | 432-25-7   | C <sub>10</sub> H <sub>16</sub> O              | 119 | 21.599 |
| 2               | 2-Heptenal, (E)-                                                    | 18829-55-5 | C <sub>7</sub> H <sub>12</sub> O               | 83  | 13.937 |
| 3               | 2-Hexenal                                                           | 505-57-7   | C <sub>6</sub> H <sub>10</sub> O               | 62  | 11.084 |
| 4               | 2-Propenal                                                          | 107-02-8   | C <sub>3</sub> H <sub>4</sub> O                | 26  | 2.417  |
| 5               | 3-Hexenal                                                           | 4440-65-7  | C <sub>6</sub> H <sub>10</sub> O               | 69  | 8.494  |
| 6               | 3-Pentenal, 4-methyl-                                               | 5362-50-5  | C <sub>6</sub> H <sub>10</sub> O               | 98  | 3.873  |
| 7               | Acetaldehyde                                                        | 75-07-0    | C <sub>2</sub> H <sub>4</sub> O                | 42  | 1.732  |
| 8               | Butanal                                                             | 123-72-8   | C <sub>4</sub> H <sub>8</sub> O                | 29  | 2.694  |
| 9               | Butanal, 3-methyl-                                                  | 590-86-3   | C <sub>5</sub> H <sub>10</sub> O               | 71  | 3.193  |
| 10              | Heptanal                                                            | 111-71-7   | C <sub>7</sub> H <sub>14</sub> O               | 70  | 9.868  |
| 11              | Hexanal                                                             | 66-25-1    | C <sub>6</sub> H <sub>12</sub> O               | 56  | 6.899  |
| 12              | Methional                                                           | 3268-49-3  | C <sub>4</sub> H <sub>8</sub> OS               | 48  | 17.459 |
| 13              | Nonanal                                                             | 124-19-6   | C <sub>9</sub> H <sub>18</sub> O               | 98  | 15.915 |
| 14              | Octanal                                                             | 124-13-0   | C <sub>8</sub> H <sub>16</sub> O               | 84  | 12.971 |
| 15              | Pentanal                                                            | 110-62-3   | C <sub>5</sub> H <sub>10</sub> O               | 58  | 4.296  |
| 16              | Propanal, 2-methyl-                                                 | 78-84-2    | C <sub>4</sub> H <sub>8</sub> O                | 72  | 2.189  |
| <b>Ester</b>    |                                                                     |            |                                                |     |        |
| 17              | 2-Hexen-1-ol, acetate, (Z)-                                         | 56922-75-9 | C <sub>8</sub> H <sub>14</sub> O <sub>2</sub>  | 88  | 14.319 |
| 18              | 2-Propenoic acid, 2-methyl-, ethenyl ester                          | 4245-37-8  | C <sub>6</sub> H <sub>8</sub> O <sub>2</sub>   | 41  | 8.226  |
| 19              | 2,4-Decadienoic acid, ethyl ester, (E,Z)-                           | 3025-30-7  | C <sub>12</sub> H <sub>20</sub> O <sub>2</sub> | 81  | 26.645 |
| 20              | 2(3H)-Furanone, 5-butyldihydro-                                     | 104-50-7   | C <sub>8</sub> H <sub>14</sub> O <sub>2</sub>  | 85  | 28.062 |
| 21              | 2(4H)-Benzofuranone,<br>5,6,7,7a-tetrahydro-4,4,7a-trimethyl-, (R)- | 17092-92-1 | C <sub>11</sub> H <sub>16</sub> O <sub>2</sub> | 111 | 35.999 |
| 22              | 3-Hexen-1-ol, acetate, (Z)-                                         | 3681-71-8  | C <sub>8</sub> H <sub>14</sub> O <sub>2</sub>  | 67  | 13.839 |
| 23              | Acetic acid ethenyl ester                                           | 108-05-4   | C <sub>4</sub> H <sub>6</sub> O <sub>2</sub>   | 86  | 4.284  |
| 24              | Acetic acid, hexyl ester                                            | 142-92-7   | C <sub>8</sub> H <sub>16</sub> O <sub>2</sub>  | 56  | 12.572 |
| 25              | Acetic acid, methoxy-, ethyl ester                                  | 3938-96-3  | C <sub>5</sub> H <sub>10</sub> O <sub>3</sub>  | 61  | 2.821  |
| 26              | Acetic acid, methyl ester                                           | 79-20-9    | C <sub>3</sub> H <sub>6</sub> O <sub>2</sub>   | 74  | 2.296  |

**Table S8** VOCs in FGJ after 24H of multi-strain fermentation

| count         | compound                                   | CAS        | Formula                                                     | mw  | Rt     |
|---------------|--------------------------------------------|------------|-------------------------------------------------------------|-----|--------|
| 27            | Butanoic acid, 2-methyl-, ethyl ester      | 7452-79-1  | C <sub>7</sub> H <sub>14</sub> O <sub>2</sub>               | 102 | 6.185  |
| 28            | Butanoic acid, 3-hydroxy-, ethyl ester     | 5405-41-4  | C <sub>6</sub> H <sub>12</sub> O <sub>3</sub>               | 195 | 19.254 |
| 29            | Butanoic acid, 3-methyl-, ethyl ester      | 108-64-5   | C <sub>7</sub> H <sub>14</sub> O <sub>2</sub>               | 88  | 6.609  |
| 30            | Butanoic acid, ethyl ester                 | 105-54-4   | C <sub>6</sub> H <sub>12</sub> O <sub>2</sub>               | 71  | 5.744  |
| 31            | Butyrolactone                              | 96-48-0    | C <sub>4</sub> H <sub>6</sub> O <sub>2</sub>                | 42  | 21.656 |
| 32            | Carbamic acid, methylnitroso-, ethyl ester | 615-53-2   | C <sub>4</sub> H <sub>8</sub> N <sub>2</sub> O <sub>3</sub> | 30  | 1.567  |
| 33            | Diethyl carbonate                          | 105-58-8   | C <sub>5</sub> H <sub>10</sub> O <sub>3</sub>               | 91  | 7.61   |
| 34            | Ethyl tiglate                              | 5837-78-5  | C <sub>7</sub> H <sub>12</sub> O <sub>2</sub>               | 83  | 11.473 |
| 35            | Formic acid, ethenyl ester                 | 692-45-5   | C <sub>3</sub> H <sub>4</sub> O <sub>2</sub>                | 29  | 2.409  |
| 36            | Hexanoic acid, 3-hydroxy-, ethyl ester     | 2305-25-1  | C <sub>8</sub> H <sub>16</sub> O <sub>3</sub>               | 46  | 23.113 |
| 37            | Hexanoic acid, 5-oxo-, ethyl ester         | 13984-57-1 | C <sub>8</sub> H <sub>14</sub> O <sub>3</sub>               | 108 | 24.115 |
| 38            | Hexanoic acid, ethyl ester                 | 123-66-0   | C <sub>8</sub> H <sub>16</sub> O <sub>2</sub>               | 88  | 11.420 |
| 39            | Isobutyl acetate                           | 110-19-0   | C <sub>6</sub> H <sub>12</sub> O <sub>2</sub>               | 43  | 6.704  |
| 40            | Pentanoic acid, ethyl ester                | 539-82-2   | C <sub>7</sub> H <sub>14</sub> O <sub>2</sub>               | 88  | 8.409  |
| 41            | Propanoic acid, 2-oxo-, ethyl ester        | 617-35-6   | C <sub>5</sub> H <sub>8</sub> O <sub>3</sub>                | 43  | 12.455 |
| 42            | Propanoic acid, ethyl ester                | 105-37-3   | C <sub>5</sub> H <sub>10</sub> O <sub>2</sub>               | 57  | 3.901  |
| <b>Ketone</b> |                                            |            |                                                             |     |        |
| 43            | 1-Penten-3-one                             | 1629-58-9  | C <sub>5</sub> H <sub>8</sub> O                             | 55  | 5.257  |
| 44            | 1H-Pyrrole-2,5-dione, 3-ethyl-4-methyl-    | 20189-42-8 | C <sub>7</sub> H <sub>9</sub> NO <sub>2</sub>               | 67  | 34.802 |
| 45            | 2-Heptanone, 6-methyl-                     | 928-68-7   | C <sub>8</sub> H <sub>16</sub> O                            | 71  | 21.181 |
| 46            | 2-Octanone                                 | 111-13-7   | C <sub>8</sub> H <sub>16</sub> O                            | 58  | 12.893 |
| 47            | 2-Pentadecanone, 6,10,14-trimethyl-        | 502-69-2   | C <sub>18</sub> H <sub>36</sub> O                           | 137 | 32.296 |
| 48            | 2,3-Hexanedione                            | 3848-24-6  | C <sub>6</sub> H <sub>10</sub> O <sub>2</sub>               | 43  | 8.312  |
| 50            | 2(5H)-Furanone                             | 497-23-4   | C <sub>4</sub> H <sub>4</sub> O <sub>2</sub>                | 84  | 24.528 |
| 51            | 3-Chloro-2,4-pentanedione                  | 1694-29-7  | C <sub>5</sub> H <sub>7</sub> ClO <sub>2</sub>              | 119 | 12.546 |
| 52            | 3-Hexanone, 4-methyl-                      | 17042-16-9 | C <sub>7</sub> H <sub>14</sub> O                            | 85  | 19.708 |
| 53            | 5-Hepten-2-one, 6-methyl-                  | 110-93-0   | C <sub>8</sub> H <sub>14</sub> O                            | 111 | 14.384 |
| 54            | Acetoin                                    | 513-86-0   | C <sub>4</sub> H <sub>8</sub> O <sub>2</sub>                | 45  | 12.917 |

**Table S8** VOCs in FGJ after 24H of multi-strain fermentation

| count | compound                            | CAS        | Formula                                      | mw  | Rt     |
|-------|-------------------------------------|------------|----------------------------------------------|-----|--------|
| 55    | Acetone                             | 67-64-1    | C <sub>3</sub> H <sub>6</sub> O              | 58  | 2.207  |
| 56    | Cyclononanone                       | 3350-30-9  | C <sub>9</sub> H <sub>16</sub> O             | 55  | 19.569 |
|       | <b>Acid</b>                         |            |                                              |     |        |
| 57    | Acetic acid                         | 64-19-7    | C <sub>2</sub> H <sub>4</sub> O <sub>2</sub> | 60  | 17.418 |
|       | <b>Alcohol</b>                      |            |                                              |     |        |
| 58    | 1-Butanol                           | 71-36-3    | C <sub>4</sub> H <sub>10</sub> O             | 56  | 9.176  |
| 59    | 1-Heptanol, 4-methyl-               | 817-91-4   | C <sub>8</sub> H <sub>18</sub> O             | 41  | 20.456 |
| 60    | 1-Hexen-3-ol                        | 4798-44-1  | C <sub>6</sub> H <sub>12</sub> O             | 57  | 12.161 |
| 61    | 1-Nonanol                           | 143-08-8   | C <sub>9</sub> H <sub>20</sub> O             | 56  | 22.882 |
| 62    | 1-Octen-3-ol                        | 3391-86-4  | C <sub>8</sub> H <sub>16</sub> O             | 72  | 17.615 |
| 63    | 1-Penten-3-ol                       | 616-25-1   | C <sub>5</sub> H <sub>10</sub> O             | 57  | 9.557  |
| 64    | 2-Chloroethanol                     | 107-07-3   | C <sub>2</sub> H <sub>5</sub> ClO            | 44  | 3.519  |
| 65    | 2-Hexen-1-ol, (E)-                  | 928-95-0   | C <sub>6</sub> H <sub>12</sub> O             | 67  | 16.494 |
| 66    | 3-Buten-1-ol, 3-methyl-             | 763-32-6   | C <sub>5</sub> H <sub>10</sub> O             | 67  | 12.053 |
| 67    | 3-Hexen-1-ol, (E)-                  | 928-97-2   | C <sub>6</sub> H <sub>12</sub> O             | 74  | 15.881 |
| 68    | 4-Methyl-2-hexanol                  | 2313-61-3  | C <sub>7</sub> H <sub>16</sub> O             | 71  | 14.157 |
| 69    | Ethanol                             | 64-17-5    | C <sub>2</sub> H <sub>6</sub> O              | 46  | 3.550  |
| 70    | Methyl Alcohol                      | 67-56-1    | CH <sub>4</sub> O                            | 31  | 2.961  |
|       | <b>Other</b>                        |            |                                              |     |        |
| 71    | 1-Penten-3-one, 2-methyl-           | 25044-01-3 | C <sub>6</sub> H <sub>10</sub> O             | 69  | 6.474  |
| 72    | 1,4-Oxathiane                       | 15980-15-1 | C <sub>4</sub> H <sub>8</sub> OS             | 104 | 15.021 |
| 73    | 2-Cyclohexen-1-ol, 2,6,6-trimethyl- | 54345-59-4 | C <sub>9</sub> H <sub>16</sub> O             | 125 | 31.210 |
| 74    | 2,5-Furandione, 3,4-dimethyl-       | 766-39-2   | C <sub>6</sub> H <sub>6</sub> O <sub>3</sub> | 54  | 24.022 |
| 75    | Acetamide                           | 60-35-5    | C <sub>2</sub> H <sub>5</sub> NO             | 59  | 24.910 |
| 76    | Acetic anhydride                    | 108-24-7   | C <sub>4</sub> H <sub>6</sub> O <sub>3</sub> | 43  | 2.821  |
| 77    | Cyclobutane, methylene-             | 1120-56-5  | C <sub>5</sub> H <sub>8</sub>                | 52  | 1.628  |
| 78    | Dodecane                            | 112-40-3   | C <sub>12</sub> H <sub>26</sub>              | 85  | 10.238 |
| 79    | Hexanenitrile                       | 628-73-9   | C <sub>6</sub> H <sub>11</sub> N             | 54  | 13.188 |

**Table S8** VOCs in FGJ after 24H of multi-strain fermentation

| count | compound               | CAS        | Formula                                       | mw  | Rt     |
|-------|------------------------|------------|-----------------------------------------------|-----|--------|
| 80    | Isopropylcyclobutane   | 872-56-0   | C <sub>7</sub> H <sub>14</sub>                | 55  | 2.448  |
| 81    | Pinocarvone            | 30460-92-5 | C <sub>10</sub> H <sub>14</sub> O             | 108 | 20.320 |
| 82    | Pyrazine, tetramethyl- | 1124-11-4  | C <sub>8</sub> H <sub>12</sub> N <sub>2</sub> | 136 | 18.169 |
| 83    | Pyrazine, trimethyl-   | 14667-55-1 | C <sub>7</sub> H <sub>10</sub> N <sub>2</sub> | 122 | 16.291 |
| 84    | Succinimide            | 123-56-8   | C <sub>4</sub> H <sub>5</sub> NO <sub>2</sub> | 99  | 38.172 |
| 85    | Tridecane              | 629-50-5   | C <sub>13</sub> H <sub>28</sub>               | 57  | 13.337 |

**Table S9** Carbohydrates (mean relative abundance > 0.5%) in FGJ during multi-strain fermentation stages

| No  | Metabolites                | <sup>a</sup> RT(min) | <sup>b</sup> m/z | Mean (0h) | Mean (8h) | Mean (16h) | Mean (24h) | Class                                     |
|-----|----------------------------|----------------------|------------------|-----------|-----------|------------|------------|-------------------------------------------|
| M1  | L-Gulose                   | 67.158               | 203.051          | 15.296    | 6.805     | 14.354     | 18.427     | Carbohydrates and carbohydrate conjugates |
| M2  | Phenylethyl primeveroside  | 281.914              | 439.155          | 0.847     | 0.866     | 0.836      | 0.608      | Carbohydrates and carbohydrate conjugates |
| M3  | 2-O-Acetylbutin            | 217.317              | 315.104          | 1.395     | 1.404     | 1.367      | 1.300      | Carbohydrates and carbohydrate conjugates |
| M4  | Hydroxytyrosol             | 249.069              | 317.119          | 11.169    | 11.130    | 10.886     | 11.002     | Amino acids, peptides, and analogues      |
| M5  | 1-O-glucoside              | 291.569              | 477.192          | 1.161     | 1.179     | 1.163      | 1.181      | Carbohydrates and carbohydrate conjugates |
| M6  | Kanokoside A               | 277.363              | 393.115          | 0.619     | 0.608     | 0.603      | 0.609      | Carbohydrates and carbohydrate conjugates |
| M7  | Garcimangosone D           | 293.056              | 343.172          | 1.523     | 1.305     | 1.711      | 0.902      | Carbohydrates and carbohydrate conjugates |
| M8  | Jasmolone glucoside        | 214.414              | 180.086          | 7.531     | 7.397     | 7.793      | 7.684      | Carbohydrates and carbohydrate conjugates |
| M9  | Glucosamine                | 458.434              | 180.086          | 1.501     | 1.407     | 1.411      | 1.501      | Carbohydrates and carbohydrate conjugates |
| M10 | L-Galactose                | 136.806              | 198.096          | 44.125    | 48.468    | 51.924     | 48.579     | Carbohydrates and carbohydrate conjugates |
| M11 | Glucosylisomaltol          | 47.381               | 289.091          | 0.717     | 0.644     | 0.586      | 0.593      | Carbohydrates and carbohydrate conjugates |
| M12 | Ethyleta-D-glucopyranoside | 101.955              | 209.101          | 4.434     | 4.350     | 4.291      | 4.312      | Carbohydrates and carbohydrate conjugates |

<sup>a</sup> RT, retention time; <sup>b</sup> m/z, mass to charge ratio.

**Table S10** Carboxylic acids and derivatives, and fatty acyls (mean relative abundance > 0.5%) in FGJ during multi-strain fermentation stages

| No  | Metabolites                | <sup>a</sup> RT(min) | <sup>b</sup> m/z | Mean (0h) | Mean (8h) | Mean (16h) | Mean (24h) | Class                            |
|-----|----------------------------|----------------------|------------------|-----------|-----------|------------|------------|----------------------------------|
| M1  | Diethyl fumarate           | 187.770              | 173.078          | 4.698     | 4.675     | 4.388      | 4.818      | Fatty Acyls                      |
| M2  | Betaine                    | 781.100              | 118.086          | 5.702     | 5.919     | 5.883      | 5.904      | Carboxylic acids and derivatives |
| M3  | Bisnorbiotin               | 71.540               | 217.067          | 5.334     | 6.158     | 5.798      | 5.456      | Organic acids and derivatives    |
| M4  | D-Proline                  | 47.620               | 116.070          | 36.555    | 34.105    | 34.187     | 33.175     | Carboxylic acids and derivatives |
| M5  | Kanokoside A               | 291.560              | 477.192          | 1.161     | 1.179     | 1.163      | 1.181      | Carboxylic acids and derivatives |
| M6  | 3,3,5-triiodo-L-thyronine- | 88.160               | 132.101          | 21.848    | 22.095    | 21.062     | 22.312     | Carboxylic acids and derivatives |
| M7  | 6-Aminopenicillanic acid   | 86.730               | 217.067          | 1.377     | 1.379     | 1.346      | 1.412      | Carboxylic acids and derivatives |
| M8  | L-Histidine                | 42.330               | 156.076          | 2.704     | 2.681     | 2.557      | 2.660      | Carboxylic acids and derivatives |
| M9  | 1-deoxy-1-(N6-lysino)-D-   | 39.680               | 134.044          | 1.875     | 1.396     | 1.299      | 1.218      | Carboxylic acids and derivatives |
| M10 | Lauroyl diethanolamide     | 494.630              | 288.252          | 5.971     | 6.020     | 6.070      | 6.290      | Fatty Acyls                      |
| M11 | (alpha-D-mannosyl)7-beta-  | 43.620               | 90.055           | 7.669     | 7.122     | 7.177      | 6.980      | Carboxylic acids and derivatives |
| M12 | 2-Methyl-3-hydroxyvaleric  | 249.040              | 133.086          | 1.574     | 1.559     | 1.506      | 1.488      | Fatty Acyls                      |
| M13 | L-Glutamic acid            | 40.560               | 148.060          | 5.577     | 4.297     | 3.644      | 3.520      | Carboxylic acids and derivatives |
| M14 | Kojibiose                  | 46.980               | 325.112          | 7.882     | 9.383     | 9.324      | 8.996      | Fatty Acyls                      |
| M15 | N-Acryloylglycine          | 69.110               | 130.050          | 2.056     | 1.962     | 2.225      | 1.965      | Carboxylic acids and derivatives |
| M16 | L-Allothreonine            | 43.780               | 120.065          | 4.112     | 3.884     | 3.924      | 3.917      | Organic acids and derivatives    |
| M17 | L-Methionine               | 55.430               | 150.058          | 2.624     | 2.744     | 2.670      | 2.719      | Organic acids and derivatives    |
| M18 | N2-Fructopyranosylarginine | 44.230               | 337.170          | 1.286     | 1.524     | 1.646      | 1.563      | Carboxylic acids and derivatives |
| M19 | (2E,4E)-2,7-Dimethyl-2,4-o | 165.380              | 199.100          | 1.535     | 1.494     | 1.743      | 1.420      | Fatty Acyls                      |
| M20 | Argininosuccinic acid      | 48.780               | 291.129          | 5.165     | 5.072     | 4.673      | 4.907      | Carboxylic acids and derivatives |
| M21 | Dihydroceramide            | 663.810              | 330.299          | 1.506     | 1.514     | 1.493      | 1.552      | Carboxylic acids and derivatives |
| M22 | Vinylacetyl glycine        | 793.910              | 144.065          | 3.097     | 3.551     | 3.031      | 3.27       | Carboxylic acids and derivatives |
| M23 | Docosanamide               | 674.180              | 340.356          | 4.009     | 2.092     | 5.347      | 4.619      | Fatty Acyls                      |
| M24 | Histidinyl-Asparagine      | 44.270               | 270.117          | 1.823     | 1.759     | 1.760      | 1.791      | Carboxylic acids and derivatives |
| M25 | Corchoionol C 9-glucoside  | 485.150              | 387.191          | 1.323     | 1.260     | 1.245      | 1.208      | Fatty Acyls                      |
| M26 | Palmitic acid              | 477.190              | 274.273          | 50.276    | 44.012    | 48.891     | 48.097     | Fatty Acyls                      |
| M27 | 2,4,12-Octadecatrienoic    | 675.110              | 334.310          | 2.582     | 2.333     | 2.365      | 2.572      | Fatty Acyls                      |

<sup>a</sup> RT, retention time; <sup>b</sup> m/z, mass to charge ratio.
